# Supplementary material for: Cell proliferation controls body size growth, tentacle morphogenesis, and regeneration in hydrozoan jellyfish Cladonema pacificum
Source: PeerJ. 2019 Aug 26;7:e7579. doi: 10.7717/peerj.7579 (PMC6714968; doi:10.7717/peerj.7579)
Supplement: Supplemental Information 4 — Statistical analysis for the proliferating cells’ distribution in umbrellas and tentacles was performed by applying the nearest neighbor distance test to EdU positive cells. [file peerj-07-7579-s004.xlsx]

## Sheet: Sheet1
		2umbrella-1	2umbrella-2	3umbrella-1	3umbrella-2	4umbrella	5umbrella-1	5umbrella-2
	N	32	10	29	19	14	18	26
	S(μm^2)	111112	111112	111112	111112	111112	111112	111112
	E[W]	19.4454	34.7851	20.4265	25.2357	29.3987	25.9272	21.5728
	W = Average NND	30.6626	48.904	30.4728	29.7742	47.2571	47.1324	36.5574
	w = W / E[W]	1.57685	1.40589	1.49183	1.17984	1.60745	1.81787	1.69461	→	>1	uniform or random
	SE	1.79685	5.74992	1.98273	3.02627	4.10709	3.1944	2.21151
	Z score	6.2427	2.4555	5.0669	1.49968	4.34818	6.63822	6.77577
		↓	↓	↓	↓	↓	↓	↓
		0.99	0.95	0.99		0.99	0.99	0.99
		uniform	uniform	uniform	random	uniform	uniform	uniform
	Z score	>|-1.65|	0.9	uniform		<|-1.65|	random
		>|-1.96|	0.95	uniform
		>|-2.58|	0.99	uniform
		1tentacle	2tentacle-1	2tentacle-2	3tentacle-1	3tentacle-2	5tentacle-1	5tentacle-2
	N	66	114	110	59	85	135	126
	S(μm^2)	33861.5	35746.7	37302	37554.5	31250	53656.5	43135.9
	E[W]	14.9495	11.6872	12.1538	16.6513	12.6549	13.1579	12.2118
	W = Average NND	9.31582	8.34799	8.27549	13.2102	9.01444	9.54489	10.6641
	w = W / E[W]	0.623154	0.714287	0.680895	0.793341	0.712326	0.725409	0.873268	→	<1	clustered or random
	SE	0.961883	0.572171	0.60574	1.13316	0.717495	0.591957	0.568672
	Z score	-5.85688	-5.83598	-6.40267	-3.03677	-5.07388	-6.10358	-2.72146
		↓	↓	↓	↓	↓	↓	↓
		0.99	0.99	0.99	0.99	0.99	0.99	0.99
		clustered	clustered	clustered	clustered	clustered	clustered	clustered
	Z score	>|-1.65|	0.9	clustered		<|-1.65|	random
		>|-1.96|	0.95	clustered
		>|-2.58|	0.99	clustered
